# Supplementary material for: A role for Caf1 in mRNA deadenylation and decay in trypanosomes and human cells
Source: PubMed Central journal article supplement — Nucleic Acids Res. 2008 Apr 27;36(10):3374–88. doi: 10.1093/nar/gkn108 (PMC2425496; doi:10.1093/nar/gkn108), 2008-04-27
Supplement: gkn108_1.pdf [file gkn108_1.pdf]

| Majority                      | M-----                                                                          | -----I |
|-------------------------------|---------------------------------------------------------------------------------|--------|
|                               | 10      20      30      40      50      60      70      80                      |        |
| Trypanosoma brucei            | MM---QYGGGTHYGA--YA-----QQQPQPQPQPHQRFPSAALKAGNVSLIPSLSKSPM-----                | 49     |
| Trichomonas vaginalis 80378   | MKAA-----                                                                       | 4      |
| Trichomonas vaginalis 80473   | MD---D-----RI-----                                                              | 5      |
| Trichomonas vaginalis 81399   | MKAG-----                                                                       | 4      |
| Trichomonas vaginalis 85323   | ME-----KN-----                                                                  | 4      |
| Trichomonas vaginalis 96423   | MKQ-----                                                                        | 3      |
| Trichomonas vaginalis 97465   | M--S-----                                                                       | 2      |
| Caenorhabditis elegans        | MASS-----                                                                       | 4      |
| Drosophila Isoform A          | MK---WTMPSAISG-----APHAH-----IPS-NEECG-----                                     | 24     |
| Drosophila Isoform B          | -----MPSAISG-----APHAH-----IPS-NEECG-----                                       | 20     |
| Saccaromyces cerevisiae       | MQSMNVQPRVLAVGGEQFFSQRQASEQHQQQNMGPOVYSPKVNRRMFPQGMPVNTINGSVNQEMNNAYLLKQKNEPLLT | 80     |
| Arabidopsis thaliana          | MS---LFLK-----DDSIQ-----                                                        | 11     |
| Aspergillus fumigatus         | MPPVGRYGPSGLSGP--YSHLQQAHLQQQQQQQQQQQAQHPAQAQSANTALPPPSLGGHPGFAAGNPNTNINPFTLS   | 78     |
| Strongylocentrotus purpuratus | M-----PTQTN-----EPH-----                                                        | 9      |
| Schistosoma mansoni           | MCHLCYSMHFPRELQS--ITQNGYSN-HILHTSLPESVNPFGKYNRYRANMTVTNDSYTPGATYHNHGHTTHNH----  | 72     |
| Chlamydomonas reinhardtii     | MS---QLASLAPQV-----QTRAE-----GLTGITPA-GDTLR-----                                | 29     |
| Ciona intestinalis            | M-----PG-QTEDP-----                                                             | 8      |
| Homo sapiens CAF1             | -----MPAATVD-----HSQR-----                                                      | 11     |
| Homo sapiens POP2             | -----MPAALVE-----NSQV-----                                                      | 11     |
| Giardia lamblia               | MS-----                                                                         | 2      |
| Schizosaccharomyces pombe     | MN---SNFSYPALG-----VDGI-----S-SQISP-----                                        | 21     |
| Entamoeba histolytica         | MQ-----P--YPGMEYPFMNINASPFYTGFSMQRFQP-----MPIMPNNRQFP-----PYVIP                 | 46     |
| Plasmodium chabaudi chabaudi  | MDE-----                                                                        | 3      |

| Majority                      | -----I                                                                        | -----I |
|-------------------------------|-------------------------------------------------------------------------------|--------|
|                               | 90      100      110      120      130      140      150      160             |        |
| Trypanosoma brucei            | -----                                                                         | I 50   |
| Trichomonas vaginalis 80378   | -----DD-----                                                                  | I 7    |
| Trichomonas vaginalis 80473   | -----                                                                         | I 6    |
| Trichomonas vaginalis 81399   | -----DD-----                                                                  | V 7    |
| Trichomonas vaginalis 85323   | -----                                                                         | I 5    |
| Trichomonas vaginalis 96423   | -----DD-----                                                                  | I 6    |
| Trichomonas vaginalis 97465   | -----DD-----                                                                  | I 5    |
| Caenorhabditis elegans        | -----SSGAGGAGGASGAPEV-----K-----                                              | I 23   |
| Drosophila Isoform A          | -----                                                                         | I 25   |
| Drosophila Isoform B          | -----                                                                         | I 21   |
| Saccaromyces cerevisiae       | QQQQQQQQQQQPFNIGTPVSVASLPPGLNVLQQQQQQQQQQQQQVGLNRPLASQLPKHLTNQSMPPIFLPPPNYLFV | 160    |
| Arabidopsis thaliana          | -----                                                                         | I 12   |
| Aspergillus fumigatus         | GTGIANGMSVAGFTGAGDGGGSLASHAAQIGFARGAQMQQQLLQTHDGRLETKAGGVKTR----              | I 143  |
| Strongylocentrotus purpuratus | -----                                                                         | I 10   |
| Schistosoma mansoni           | ---IHHGLLHPVHSNPSNVTALTVSQDSSQV-----R-----                                    | V 102  |
| Chlamydomonas reinhardtii     | -----                                                                         | V 30   |
| Ciona intestinalis            | -----                                                                         | I 9    |
| Homo sapiens CAF1             | -----                                                                         | I 12   |
| Homo sapiens POP2             | -----                                                                         | I 12   |
| Giardia lamblia               | -----GDTSE-----                                                               | I 8    |
| Schizosaccharomyces pombe     | -----                                                                         | I 22   |
| Entamoeba histolytica         | EPNYQNSY----FT-----                                                           | 56     |
| Plasmodium chabaudi chabaudi  | -----RTK-----                                                                 | I 7    |

| Majority                      | RDVWASNLEEEEMAKIRELVEDYPYVAMDFEPGVVARPV-----GEFRSS--ADYHYQTLRCNVDLLKIIQLGITLSDEK  |     |
|-------------------------------|-----------------------------------------------------------------------------------|-----|
|                               | 170 180 190 200 210 220 230 240                                                   |     |
| Trypanosoma brucei            | RDVWEDNLEQEFGIIRSLIKDYPFVAMDFEPGVVAKPV-----GNFKST--HEFYQTLRCNVNLLKMIQLGITLNEK     | 123 |
| Trichomonas vaginalis 80378   | VDVWAHLEETEIEKIAQLLPKYFYVGMDFEFGFVKSP-----PVTAT--DEVKYQAEENVNRMKIIQIGITLADD       | 79  |
| Trichomonas vaginalis 80473   | RDVWASNLEQELKIIISDLIEDYPYIAMDFEFGVIVKPV-----GSFKST--QELEYQTLRCNVDLLKIIQIGITLGDKE  | 79  |
| Trichomonas vaginalis 81399   | MDVWANLEEEELKISKLVETIKFVGMDFEFGFIVKTF-----N-NTP--DDVKYHAEQTNVNLKLIQIGITLGDKE      | 78  |
| Trichomonas vaginalis 85323   | RDVWAHLEEDMKKISELIEDYPYIAMDFEFGQIAKPF-----GSFSSQ--EDYVYQLTRLNVDYKLIQIGITLGDGQ     | 78  |
| Trichomonas vaginalis 96423   | VDVWYNLETEEMKIAFLLPKYFYVGMDFEFGFVFKSP-----PFSAS--DEVKYQVERENVNRMKIIQIGITLADDE     | 78  |
| Trichomonas vaginalis 97465   | IDVWDYNLEEEHFKISLVEHFHFVGMDFEFGFVFKSP-----PVTAT--PTVKYLTERENVNRMKIIQIGITLGDEN     | 77  |
| Caenorhabditis elegans        | HNVMYSNVEEEFARIRGFVEDYPYVAMDFEPGVVATPL-----GIFRSK--EDFNYQQVFCNVNMLKLIQVGFAMVNDK   | 96  |
| Drosophila Isoform A          | RDVWKQNLLEEFRTIRKVMQKYFYVAMDFEPGVVARPV-----GEFRST--ADYHYQLRCNVDLLRIIQLGLTFMDD     | 98  |
| Drosophila Isoform B          | RDVWKQNLLEEFRTIRKVMQKYFYVAMDFEPGVVARPV-----GEFRST--ADYHYQLRCNVDLLRIIQLGLTFMDD     | 94  |
| Saccaromyces cerevisiae       | RDVWKSNTLYSEFAVIRQLVSOYHVSISTEFVGLARPI-----GIFRSKV--DYHYQTLRANVDLNLPIQLGLSLSDAN   | 233 |
| Arabidopsis thaliana          | REVMNDNLESEMALIREVDDFPEVAMDFEFGVIGRPV-----GITFKN--TEYHYETLKTINVNILKVIQLGLTFSDDEK  | 85  |
| Aspergillus fumigatus         | RDVWKHNLAEEMAVLRCLVEKYPYISMDTEFPGVVARPI-----GSFTNK--ADYHYQTLRCNVDLLKMIQLGITLFSAD  | 216 |
| Strongylocentrotus purpuratus | VDVWNTNLEDFVKIRIVVQKYFYVAMDFEPGVVARPL-----GEFRTN--SEYQYQLRCNVDLLKIIQLGITLFDQDQ    | 83  |
| Schistosoma mansoni           | WDIWTNHFHEGMLVRRLLVRECOYVAMDFEFGVVAKVF-----GEYANSFEQA--YHNKIVNIDMLKPIQIGFSFFDES   | 175 |
| Chlamydomonas reinhardtii     | REVWADNMEVEFALLRDIYEDYPYIAMDFEFGVVAKPI-----GITFKSS--REYLYKALKMNVDMKLIQIGLTLTDAK   | 103 |
| Ciona intestinalis            | VEVWANNVESVFKAIRKLVKQYFYVAMDFEPGVVARPI-----GEFRTN--SDYQYQLRCNVDMKLIQIGLTFMDEN     | 82  |
| Homo sapiens CAF1             | CEVWACNLDDEEMKKIRQVIRKYYVAMDFEPGVVARPI-----GEFRSN--ADYQYQLRCNVDLLKIIQLGLTFMDEQ    | 85  |
| Homo sapiens POP2             | CEVWASNLEEEEMRKIREIVPSYSYIAMDFEFGVVARPI-----GEFRSS--IDYQYQLRCNVDLLKIIQLGLTFTNEK   | 85  |
| Giardia lamblia               | FDVYASDLTQAMQEISSLLADYPTVAIDTEFPGYFENTVQLSLLTORQILSKHASAYAAKYINVDLSLQIQLGITLSNSA  | 88  |
| Schizosaccharomyces pombe     | RDVWSTNLEQEMNLIIMSLIERYPVYSMDTEFPGVVARPL-----GVFKSS--DDYHYQTLRANVDSLKIIQIGLALSDEE | 95  |
| Entamoeba histolytica         | -DVYQNNLQEEEMNISELIDNYPVYSMDTEFPGFSSRTS-----CNMQDSVDPDEHYSLKGNVDELKIIQIGITLQNKK   | 130 |
| Plasmodium chabaudi chabaudi  | VDVWANLEEEEFKIRIDVIESHPYVATDTEFPGVVARPT-----GNV-----VDYNYQTLRCNVDLLKVIQLGVTFNNGK  | 77  |

| Majority                      | GETP-P-----CTWQFNFK-FNLSEDMYAQDSIELLQSGIDFKKHEEDGIDPADFAELLMSSGLVL              |     |
|-------------------------------|---------------------------------------------------------------------------------|-----|
|                               | 250 260 270 280 290 300 310 320                                                 |     |
| Trypanosoma brucei            | GEVPEPENC-----CTWQFNFR-FCLTEDVYAQDSIELLCHGGINFDFYSEYVGEVTHFAELLISSGLVL          | 185 |
| Trichomonas vaginalis 80378   | GKVPQPI-----CTWQFNFK-FDVSHDMQSLDSINLLYQSGIDFQFAEDGIDLNDFIPIFFSSGLVM             | 141 |
| Trichomonas vaginalis 80473   | GFYPTPC-----CTWQFNFK-FDEKRDPHFHRSTVLLQSGIDFKRFNNDGIDVYEFARLLIPSGLM              | 141 |
| Trichomonas vaginalis 81399   | GNRPSPY-----CTWQFNFK-FVNSDLCAEESTINLLRQSGIDFKFYKDGIDIDYDFVPMFYSSGLVM            | 140 |
| Trichomonas vaginalis 85323   | GGYPOPC-----STWQFNFK-FNLDEDMYTSESTIELLQSGIDFKRFNNEGISTPFDFTQLLYTSGLM            | 140 |
| Trichomonas vaginalis 96423   | GKVPQPI-----CTWQFNFK-FDLSDHMQSSTDSINLLFQSGIDFKKFLKDGIDISDFIPIFYASGLIM           | 140 |
| Trichomonas vaginalis 97465   | GNIPKPI-----CTWQFNFR-FNIKNDMHTSDSINLLKQAGIDFKKFKKDGIEADVFVSLIASGLVM             | 139 |
| Caenorhabditis elegans        | GELP-----PTGDVWQFNFN-FSFAEDMFSHESVEMLRQAGIDFTLLONNGIPTAVFCELLTTSGLIT            | 158 |
| Drosophila Isoform A          | GKTP-P-----GY-----STWQFNFK-FNLSEDMYAQDSIDLLQNSGIDFKKHEEDGIDPFDFAELLMSSGLVL      | 160 |
| Drosophila Isoform B          | GKTP-P-----GY-----STWQFNFK-FNLSEDMYAQDSIDLLQNSGIDFKKHEEDGIDPFDFAELLMSSGLVL      | 156 |
| Saccaromyces cerevisiae       | GNKPDN-----GPSTWQFNFR-FDPKKEIMSTESLELLRKSGINFKEKHNELGIDVFEFSQLLMDSSGLMM         | 296 |
| Arabidopsis thaliana          | GNLP-TCGTDNKY-----CTWQFNFR-FDLESDIYATDSIELLRQSGIDFKVKNNEFGIDSKRFAELLMSSGLVL     | 153 |
| Aspergillus fumigatus         | GEVPPP NATDANGQPLGNSLVAPCTWQFNFR-FSLENMYAQESTAMLAKAGIDFNMHEKNGIDPFEFGALLISSGLVL | 295 |
| Strongylocentrotus purpuratus | GNFP-K-----SG-----STWQFNFR-FNLSEDMYAKDSIELLQSGIDFKKHEEDGIEVDHFAELLMTSGVL        | 145 |
| Schistosoma mansoni           | GQTVDAVSTV-----QFNFK-WNVDNEMHAADSIQLLEVSGIDFKLKRIGVELSDFAEAFLTSGLP              | 237 |
| Chlamydomonas reinhardtii     | GILP-R-AANGEL-----CWQFNFKFKLSDDVYAQDSIELLRQSGIDFALHEARGIDVHRFGCELLMTSGIVL       | 170 |
| Ciona intestinalis            | GETP-P-----DV-----STWQFNFK-FNLTEDMYAQDSIDLLNNSGIDFKQHEIDGIEPLFYAELLMSSGLVL      | 144 |
| Homo sapiens CAF1             | GEYP-P-----GT-----STWQFNFK-FNLTEDMYAQDSIELLTSIGIDFKKHEEFGIETQYFAELLMTSGVL       | 147 |
| Homo sapiens POP2             | GEYP-S-----GI-----NTWQFNFK-FNLTEDMYSQDSIDLLANSGLQFKKHEEFGIDTLHFAELLMTSGVL       | 147 |
| Giardia lamblia               | GETPKPHST-----WQFNML-FDETTPLSTSNMNLLEHSGIDFPRLSRDGIHPVAFSYEIQISGLIY             | 150 |
| Schizosaccharomyces pombe     | GNAP-V-----EA-----CTWQFNFT-FNLQDDMYAPESTIELLTKSGIDFKKHEEFGIEPADFAELLISSGLVL     | 157 |
| Entamoeba histolytica         | GQYPD-----NVRTWQFNFR-FDTDKDESSVDSIQLLQKAGINFCKFKNAGISAEDFGEATMASGLVL            | 192 |
| Plasmodium chabaudi chabaudi  | G-----VLPKVSSTWQFNFK-FDLSDMYAQNSIDFLKLSGINFEKQSLGIELLHFGVIMSSGLVM               | 138 |

| Majority                      | NDNVTWLTFFHSGYDFGYLLKLLTC-QPLPETESEFFELLRIYFP-NIYDIKYLKMK-----SC-NLKG-G          |     |
|-------------------------------|----------------------------------------------------------------------------------|-----|
|                               | 330 340 350 360 370 380 390 400                                                  |     |
| Trypanosoma brucei            | NPDIRWLAFAHAGYDFGYLLKVVGG-KDLPKKEEDFLQTFHALFP-CVYDIKYLRLR-----STELTHSLG          | 247 |
| Trichomonas vaginalis 80378   | NEHVIWITFAASDYDIAYLVKLVTA-DTLPKTSREFFDNVVKTYFP-HYYDVRYMIMSIFPGIG-----            | 201 |
| Trichomonas vaginalis 80473   | NPGITWVWFHSLTDFGYLLKLVTA-KPLPETCAAFKVLLEYFP-NFYDIKYTYT-----PRTEIAD-G             | 202 |
| Trichomonas vaginalis 81399   | NDKINWITFQCGDYDIAYLVKLSA-SPLPKSDTEFAKIVKQYFP-NYYDLRYIMGTITDQVG-----              | 200 |
| Trichomonas vaginalis 85323   | NDRITYLTYHSVSDFAYLKMLTGC-KPLPPDVKFNAQLNLFYFP-HYYDIKLIAS-----NMDLMG-G             | 201 |
| Trichomonas vaginalis 96423   | NDNVIWVTFAGYDYDIAYLVKLVTA-DI LPDTSAEFFDRVRYTYFP-HYYDVRYMIMQINPGVG-----           | 200 |
| Trichomonas vaginalis 97465   | NDRVIWITFQAGDYDIAYLVKLSA-OPLPKTEAEFEKVTIRLYFP-HYYDLRYIMQTIHNVG-----              | 199 |
| Caenorhabditis elegans        | DPRITWLTFFHSGYDFGYLLKSLTIL-GDLPKEESTIFFMCHKTLFP-TSFDIKILLRT-----PNCASAKLKG       | 222 |
| Drosophila Isoform A          | VENIKWLCFHSGYDFGYLLKLLTD-QNLPDSEFFDLLHIYFP-NIFDIKYLKMK-----SCKNLKG-G             | 221 |
| Drosophila Isoform B          | VENIKWLCFHSGYDFGYLLKLLTD-QNLPDSEFFDLLHIYFP-NIFDIKYLKMK-----SCKNLKG-G             | 217 |
| Saccaromyces cerevisiae       | DDSVTWITFHAAYDLCFLINILMN-DSMPNKKEDFEWVWHQYMP-NFYDLNLVYKII-----QEFKNPQLQSSSQOQQO  | 368 |
| Arabidopsis thaliana          | NENVHWVTFHSGYDFGYLLKLLTC-QNLPETOTGFFEMISVYFP-RVYDIKILKMK-----FQNSLH-G-G          | 214 |
| Aspergillus fumigatus         | LDDVHWVWFHSGYDFGYLLKMLTGC-KPLPENEDFHTLLKIFFP-SLYDIKYLKMHAGRNQAVNDSPLTAAAIQILTNLG | 373 |
| Strongylocentrotus purpuratus | NDSVKWVTFHSSYDFAYLTKLVTA-TNLPSESEFFELLRIFFFP-RIYDVKYLKMK-----SCKDLKG-G           | 206 |
| Schistosoma mansoni           | NDKITWIGFHSAYDFAYLTKICTDWMRMPDNLFQKLLIIFFP-KIVDLKSMSE-----HKFP-----              | 296 |
| Chlamydomonas reinhardtii     | NDDVRWVTFHSSYDFGYLLKLLTC-QPLPGTEQEFFELLNIYFP-NIFDIKYLKMK-----YCDNLH-G-G          | 231 |
| Ciona intestinalis            | MENVKWVWFHSGYDFGYLLKLLTC-QNLPDSESLFFELLQMFPP-TIYDIKYLKMK-----SCKNLKG-G           | 205 |
| Homo sapiens CAF1             | CEGVKWLWFHSGYDFGYLLKILTN-SNLPPEELDFEETIRLFFFP-VIYDVKYLKMK-----SCKNLKG-G          | 208 |
| Homo sapiens POP2             | CDNVKWLWFHSGYDFGYMMKLLTD-SRLPEEEHEFLHILNLFSP-SIYDVKYLKMK-----SCKNLKG-G           | 208 |
| Giardia lamblia               | NRSITYVGFHGSDFGYLLKAVTGC-NDLPYSKKDFDELLRTLFFPKLYDLKH-----CGSWSG-G                | 207 |
| Schizosaccharomyces pombe     | QEEVWVTFHSGYDFAYLTKAVTQ-IPLPAEYEFYKILCIYFP-KNYDIKYLKMK-----SVLNNSK-G             | 218 |
| Entamoeba histolytica         | NENTHWLTFHSGYDFGYLLKLLTC-EKLPSTVDGFIKKLRIFFP-NIIDLYKVTNQISQTYHG-----             | 253 |
| Plasmodium chabaudi chabaudi  | NEDVKWVTFHSGYDFAYLTKLLTGC-CALPHSEREFFDLDHDFFP-SLYDIKYLKLLNL-----NIRKQLS          | 199 |

| Majority                      | ---LQEVADQLGVQRIGPQHAGSDSLLTGLTFFKLRKYFEGNID--K---G-LYGL-----                 |     |
|-------------------------------|-------------------------------------------------------------------------------|-----|
|                               | 410 420 430 440 450 460 470 480                                               |     |
| Trypanosoma brucei            | ---LDHLADSLRVRRFQMAHQAGSDSLLTGHCYFKLLRDCFNINIPVAN--N-GVLYGL-----              | 300 |
| Trichomonas vaginalis 80378   | ---SLQSTSKDLGVVRFQPMHQAGSDSYVTLISYFAACRYKFKGAI-----VHDFRFRNKSCK               | 255 |
| Trichomonas vaginalis 80473   | ---LQKIANQLGVSRYGREHQAGSDAFVTLKVFELKRQLVITDAELNN-----TLEKFRNKG-Q              | 248 |
| Trichomonas vaginalis 81399   | ---SLQEVARDLVNVRYPGVHQAGSDSYVTLISYKVTIEQHFDGNL-----IHEKFRNKSCK                | 253 |
| Trichomonas vaginalis 85323   | ---LQALANELNVRYPGPAHQAGSDALVTLDTFVALMKYFGGKLENEK-----LNERYRNKGLK              | 247 |
| Trichomonas vaginalis 96423   | ---SLQSLSKELGVLRYGPMHQAGSDSYVTLISYFAACRRHFRGTL-----IHEKFRNKSCK                | 254 |
| Trichomonas vaginalis 97465   | ---SLQVAKDFDVVRSQTMHQAGSDSYVTLISYKAMAKHFGVL-----LNERYRNKGLK                   | 253 |
| Caenorhabditis elegans        | ---GLQEVADQLDVKRCQVRHQAGSDALLTAATFFKIKKOFFGDNWNIAPLICGHMFGLSLFLHS-----        | 288 |
| Drosophila Isoform A          | ---LQEVADQLELRRVGPQHAGSDALLTGMAFFKMRMFFEDNIDHAK--YSGHLYGL-----                | 275 |
| Drosophila Isoform B          | ---LQEVADQLELRRVGPQHAGSDALLTGMAFFKMRMFFEDNIDHAK--YSGHLYGL-----                | 271 |
| Saccaromyces cerevisiae       | QQYSLTTLADELGLPRFSIFTTTIGCSLLMMLSFQCQLS-----KLSMHKFPNGT-----                  | 417 |
| Arabidopsis thaliana          | ---LNKLAELLQVVERVGIHQAGSDSLLTSCIFRKLQENFF--IGSMK--YSGVLYGL-----               | 266 |
| Aspergillus fumigatus         | QKSGLDIADLGVKRVGIAHQAGSDSLVTGEIYWKMRQLIFNGKIDEGK--YSGIHWGL-----               | 431 |
| Strongylocentrotus purpuratus | ---LQEVADILQIQRIGPQHAGSDSLLTVCTFLKMRCEYFEDNIDDDK--YCGHLYGL-----               | 260 |
| Schistosoma mansoni           | -KSQLQELADLMRVPRIGIQHQAGSDAMLTGETFRFLIEHSGGKIDQ-RVL--NLVYGL-----NYCPNGVSNT-   | 362 |
| Chlamydomonas reinhardtii     | ---LNKLAEMLDVQRIGPQHAGSDSLLTSATFIKLANKYFHGIDGASK--HMGVLFGL-----               | 285 |
| Ciona intestinalis            | ---LQEVSEQLQVVERVGIHQAGSDSLLTGMVTFKMRKYFDNEMNIPK--FCGHLYGL-----               | 259 |
| Homo sapiens CAF1             | ---LQEVAEQLQLERIGPQHAGSDSLLTGMAFFKMRMFFEDHIDDAK--YCGHLYGL-----                | 262 |
| Homo sapiens POP2             | ---LQEVADQLDLQRIGPQHAGSDSLLTGMAFFKMRMFFEDHIDDAK--YCGHLYGL-----                | 262 |
| Giardia lamblia               | ---SLESLAGSYGVRWCGPQHAGSDALVTLRTFHLKDNV-----                                  | 245 |
| Schizosaccharomyces pombe     | ---LQDIADDLQIHRIGPQHAGSDALLTARIFFEIRSRYFDGSDSRM--L-NQLYGL-----                | 271 |
| Entamoeba histolytica         | ---SLQAIASSLVQRIGTMHQAGSDSLLTGGLYFKLKEK--HPEFDDEK--FNGILFGL-----              | 306 |
| Plasmodium chabaudi chabaudi  | RTFSLQKISEILSVKRIQHQAGSDSLVTCKTFFKLLLELYFDNKIDDKK--YSGIYGLGTTIKNYNKFDDNAYKHNN | 277 |

| Majority                      | -----G-----                                          | -----                                                                  |
|-------------------------------|------------------------------------------------------|------------------------------------------------------------------------|
|                               | 490                                                  | 500                                                                    |
| Trypanosoma brucei            | -----CEDSS-----                                      | -----SAGTPN-----                                                       |
| Trichomonas vaginalis 80378   | -----                                                | -----STTIPGSGGGGHA-----                                                |
| Trichomonas vaginalis 80473   | -----                                                | -----                                                                  |
| Trichomonas vaginalis 81399   | -----                                                | -----                                                                  |
| Trichomonas vaginalis 85323   | -----                                                | -----                                                                  |
| Trichomonas vaginalis 96423   | -----                                                | -----                                                                  |
| Trichomonas vaginalis 97465   | -----                                                | -----                                                                  |
| Caenorhabditis elegans        | -----                                                | -----SGSTSRLGD-----ETPQGLIGVPQ-----                                    |
| Drosophila Isoform A          | -----GTS-----                                        | -----FIVNGTNFHDSNGET-----                                              |
| Drosophila Isoform B          | -----GTS-----                                        | -----FIVNGTNFHDSNGET-----                                              |
| Saccaromyces cerevisiae       | -----                                                | -----                                                                  |
| Arabidopsis thaliana          | -----GVENG-----                                      | -----QIVH-----                                                         |
| Aspergillus fumigatus         | -----NGQMPAMTYHMQPHQTPNLNGATIYSAAGTPSTPNTGRQTPQ----- | -----                                                                  |
| Strongylocentrotus purpuratus | -----GSA-----                                        | -----YMQNGSAYTEENNAAPAT-----                                           |
| Schistosoma mansoni           | -----                                                | -----WMQMNG--SSPQHDSE-----                                             |
| Chlamydomonas reinhardtii     | -----GVDGA-----                                      | -----PESKGGQDNGS-----                                                  |
| Ciona intestinalis            | -----GSS-----                                        | -----YIQNGNPY---SAEE-----                                              |
| Homo sapiens CAF1             | -----GSG-----                                        | -----SSYVQNGTGNAYEEE-----                                              |
| Homo sapiens POP2             | -----GTG-----                                        | -----VAQKQNEVDVSAQEKMSE-----                                           |
| Giardia lamblia               | -----                                                | -----DFLTPANDHVIY-----                                                 |
| Schizosaccharomyces pombe     | -----GSTGSVLWH--NNSSTPQIQ---                         | -----FRDLPGAHPSPTPSNAGI-----                                           |
| Entamoeba histolytica         | -----                                                | -----NDEY-----                                                         |
| Plasmodium chabaudi chabaudi  | NNNNNNNG                                             | NNNSGVYYGNNNYAKKNNNGNNTSIYGNNSNDKNHDNNNNNQYWDGKNDIISANNNSHYMHNNINGNNNG |

| Majority                      | -----                                                                        | -----                       |
|-------------------------------|------------------------------------------------------------------------------|-----------------------------|
|                               | 570                                                                          | 580                         |
| Trypanosoma brucei            | -----FSNFTGSKNAA--FPASPIMTQAVKG-----                                         | -----HS-----                |
| Trichomonas vaginalis 80378   | -----                                                                        | -----                       |
| Trichomonas vaginalis 80473   | -----AKNKL--FGASAIV-----                                                     | -----                       |
| Trichomonas vaginalis 81399   | -----                                                                        | -----                       |
| Trichomonas vaginalis 85323   | -----FENKI--YS----I-----                                                     | -----                       |
| Trichomonas vaginalis 96423   | -----                                                                        | -----                       |
| Trichomonas vaginalis 97465   | -----                                                                        | -----                       |
| Caenorhabditis elegans        | -----                                                                        | -----QA-----                |
| Drosophila Isoform A          | -----NSAS-----                                                               | -----                       |
| Drosophila Isoform B          | -----NSAS-----                                                               | -----                       |
| Saccaromyces cerevisiae       | DFAKY-----                                                                   | -----QGVIIYGIDGD-----Q----- |
| Arabidopsis thaliana          | -----                                                                        | -----                       |
| Aspergillus fumigatus         | -----HHGGNIGGALTPGGPGGVMGAFQTG-----                                          | -----KA-----                |
| Strongylocentrotus purpuratus | -----TAT-----                                                                | -----                       |
| Schistosoma mansoni           | -----SSAGHNVSAYSSIFRNNVHSAD-----                                             | -----HSGRTSPADSTGGHKSS----- |
| Chlamydomonas reinhardtii     | -----                                                                        | -----                       |
| Ciona intestinalis            | -----YNKN-----                                                               | -----                       |
| Homo sapiens CAF1             | -----ANKQS-----                                                              | -----                       |
| Homo sapiens POP2             | -----LAIINMQQ-----                                                           | -----                       |
| Giardia lamblia               | -----                                                                        | -----GFH-----               |
| Schizosaccharomyces pombe     | -----PTTLTNTSSAPNFANSTFRFPPRVV-----                                          | -----                       |
| Entamoeba histolytica         | -----                                                                        | -----E-----                 |
| Plasmodium chabaudi chabaudi  | DLYTYVDSTNNREYMIASFSDAVKGNIKSDVLYNLYSDMNQNNYMMMPGMNMMGTNNNFNTNICNTNNNTNGNINN | -----                       |

Decoration 'Decoration #1': Shade (with solid black) residues that match the Consensus exactly.
